# Supplementary material for: Complications Following Radiofrequency Ablation of Benign Thyroid Nodules: A Systematic Review
Source: PubMed Central journal article supplement — Chin Med J (Engl). 2017 Jun 5;130(11):1361–70. doi: 10.4103/0366-6999.206347 (PMC5455047; doi:10.4103/0366-6999.206347), 2017-06-05
Supplement: CMJ-130-1361_Suppl1.pdf [file CMJ-130-1361_Suppl1.pdf]

## **SUPPLEMENTARY 1: SEARCH STRATEGY**

### ***PubMed (January 1950 to December. 30 2016)***

1. "Ablation Techniques"[Mesh]
2. "Catheter Ablation "[Mesh]
3. 1 OR 2
4. "Thyroid Nodule"[Mesh]
5. 3 AND 4
6. "Radiofrequency ablation" OR "RFA" OR "RF ablation"  
OR "Radiofrequency treatment" OR "radio-frequency  
ablation" OR "radiofrequency catheter ablation" OR  
"radiofrequency thermal ablation" OR "RTA"
7. Thyroid
8. 6 AND 7
9. 5 OR 8

Results: 326

### ***Embase (1980-present)***

1. 'radiofrequency ablation':ab, ti
2. 'rfa':ab, ti
3. 'rf ablation':ab, ti
4. 'radiofrequency thermal ablation':ab, ti
5. 'rta':ab, ti
6. 1 OR 2 OR 3 OR 4 OR 5
7. thyroid: ab, ti
8. 6 AND 7

Results: 379

### ***The Cochrane Library***

1. Radiofrequency [Title, Abstract, Keywords]
2. Ablation [Title, Abstract, Keywords]
3. Thyroid [Title, Abstract, Keywords]
4. 1 AND 2 AND 3

Results: 17
